# Supplementary material for: Mortality risk in atrial fibrillation: the role of aspirin, vitamin K and non-vitamin K antagonists
Source: Springer Nature journal article supplement (doi:10.1007/s11096-019-00916-1), 2019-10-08
Supplement: MOESM1 [file 17250786]

**Supplementary table 1**

|  | **Low CHA2DS2-VASc (<2)** | | | | **Medium CHA2DS2-VASc (2-3)** | | | | **High CHA2DS2-VASc (≥ 4)** | | | |
| --- | --- | --- | --- | --- | --- | --- | --- | --- | --- | --- | --- | --- |
| **Users** | **NOAC**  (n=327) | **VKA** (n=3,349) | **Aspirin**  (n=4,370) | **Mixed**  (n=103) | **NOAC**  (n=581) | **VKA**  (n=6,215) | **Aspirin**  (n=7,308) | **Mixed**  (n=223) | **NOAC**  (n=398) | **VKA**  (n=4,079) | **Aspirin**  (n=4,416) | **Mixed**  (n=128) |
|  |  |  |  |  |  |  |  |  |  |  |  |  |
| **Females** | 39 (12%) | 470 (14%) | 840 (19%) | 11 (11 %) | 241 (42%) | 2,595 (42%) | 3,453 (47%) | 63 (28%) | 309 (77%) | 321 (79%) | 3,715 (84%) | 89 (10%) |
| Follow-up, years (SD) | 1.0 (0.6) | 3.0 (1.9) | 3.2 (1.8) | 3.1 (1.9) | 0.9 (0.6) | 2.7 (1.9) | 2.8 (1.9) | 3.0 (2.0) | 0.9 (0.6) | 2.5 (1.8) | 2.5 (1.8) | 2.8( 2.0) |
| Age, mean (years. SD) | 57.7 (9.1) | 58.1 (9.7) | 59.3 (12.7) | 60.5 (10.6) | 74.4 (9.2) | 73.9 (8.9) | 76.1 (12.7) | 72.9 (10.6) | 82.4 (6.7) | 80.7 (6.1) | 83.7 (12.7) | 80.4 (10.6) |
| BMI (kg/m2), mean (SD) | 29.2 (6.4) | 29.4 (6.2) | 29.0 (6.2) | 29.8 (6.6) | 27.7 (6.1) | 28.6 (6.6) | 27.6 (6.2) | 29.0 (6.6) | 27.1 (6.1) | 28.1 (6.0) | 26.9 (6.2) | 27.9 (6.6) |
| **Smoking status** |  |  |  |  |  |  |  |  |  |  |  |  |
| Never | 146 (45%) | 1,393 (42%) | 1,809 (44%) | 35 (38%) | 242 (42%) | 2,420 (39%) | 3,059 (44%) | 80 (38%) | 178 (45%) | 1,846 (45%) | 2,206 (44%) | 58 (38%) |
| Current | 42 (13%) | 516 (15%) | 695 (10%) | 19 (12%) | 32 (6%) | 503 (8%) | 619 (10%) | 24 (12%) | 31 (8%) | 211 (5%) | 234 (10%) | 11 (12%) |
| Ex | 136 (42%) | 1,431 (43%) | 1,862 (46%) | 49 (50%) | 304 (52%) | 3,260 (53%) | 3,577 (46%) | 118 (50%) | 188 (47%) | 2,000 (49%) | 1,952 (46%) | 58 (50%) |
| Missing | <5 (1%) | 9 (0%) | 81 (1%) | <5 (0%) | <5 (1%) | 32 (1%) | 81 (1%) | <5 (0%) | <5 (0%) | 22 (1%) | 81 (1%) | < 5 (0%) |
| **Alcohol Use** |  |  |  |  |  |  |  |  |  |  |  |  |
| Yes | 255 (78%) | 2,639 (79%) | 3,491 (68%) | 77 (69%) | 415 (72%) | 4,388 (71%) | 5,047 (68%) | 154 (69%) | 235 (59%) | 2,486 (61%) | 2,464 (68%) | 82 (69%) |
| No | 38 (12%) | 453 (14%) | 597 (24%) | 17 (22%) | 116 (20%) | 1,383 (22%) | 1,634 (24%) | 50 (22%) | 134 (34%) | 1,322 (32%) | 1,563 (24%) | 33 (22%) |
| Missing | 34 (10%) | 257 (8%) | 282 (8%) | 9 (9%) | 50 (9%) | 444 (7%) | 627 (8%) | 19 (9%) | 29 (7%) | 271 (7%) | 389 (8%) | 13 (9%) |
| **History of disease ever before** | | | | | | | | | | | | |
| Acute renal failure | <5 (0%) | <5 (0%) | 10 (0%) | <5 (0%) | <5 (1%) | 25 (0%) | 49 (1%) | <5 (1%) | <5 (1%) | 36 (1%) | 61 (1%) | <5 (0%) |
| Cerebrovascular disease | 27 (8%) | 170 (5%) | 50 (1%) | 10 (10%) | 82 (14%) | 654 (11%) | 288 (4%) | 23 (10%) | 138 (35%) | 998 (25%) | 650 (15%) | 40 (31%) |
| Chronic renal failure | <5 (0.0%) | 13 (0%) | 12 (0%) | <5 (4%) | <5 (0%) | 56 (1%) | 61 (1%) | <5 (0%) | 6 (2%) | 88 (2%) | 85 (2%) | <5 (1%) |
| Liver disease | <5 (0.0%) | 5 (0%) | 10 (0%) | <5 (4%) | <5 (0%) | 7 (0%) | 19 (0%) | <5 (0%) | <5 (0%) | <5 (0%) | 6 (0%) | <5 (1%) |
| Cancer | <5 (0.0%) | 22 (1%) | 29 (1%) | <5 (4%) | 8 (1%) | 55 (1%) | 51 (1%) | <5 (0%) | < 5(1%) | 48 (1%) | 42(1%) | <5 (2%) |
| Peripheral artery disease | <5 (0.0%) | 21 (1%) | 24 (1%) | <5 (4%) | 18 (3%) | 195 (3%) | 211 (3%) | 13 (6%) | 52 (13%) | 496 (12%) | 426 (10%) | 13 (10%) |
| Ischemic heart disease | 8 (2%) | 117 (4%) | 158 (4%) | 15 (15%) | 37 (6%) | 549 (9%) | 558 (8%) | 64 (29%) | 66 (17%) | 795 (20%) | 783 (18%) | 36 (28%) |
| congestive heart failure | 11 (3%) | 123 (4%) | 36 (1%) | 6 (6%) | 27 (5%) | 461 (7%) | 210 (3%) | 27 (12%) | 60 (15%) | 812 (20%) | 715 (16%) | 35 (27%) |
| History of AMI | <5 (1%) | 21 (1%) | <5 (1%) | 9 (9%) | 10 (2%) | 170 (3%) | 226 (3%) | 40 (18%) | 26 (7%) | 354 (9%) | 431 (10%) | 23 (18%) |
| Stroke | 7 (2%) | 55 (2%) | 16 (0%) | <5 (3%) | 51 (9%) | 384 (6%) | 157 (2%) | 15 (7%) | 111 (28%) | 781 (19%) | 531 (12%) | 29 (23%) |
| Family history of vascular disease | 5 (2%) | 40 (1%) | 59 (1%) | 9 (9%) | 27 (5%) | 336 (5%) | 418 (6%) | 51 (23%) | 73 (18%) | 793 (19%) | 803 (18%) | 32 (25%) |
| **Drug use within six months prior to index date** | | | | | | | | | | | | |
| ACE inhibitors | 59 (18%) | 540 (16%) | 516 (12%) | 12 (12%) | 140 (24%) | 1,714 (28%) | 1,554 (21%) | 50 (22%) | 143 (36%) | 1,595 (39%) | 1,504 (34%) | 42 (33%) |
| anti-arrythmic drugs | 37 (11%) | 307 (9%) | 262 (6%) | <5 (3%) | 33 (6%) | 364 (6%) | 267 (4%) | 6 (3%) | 11 (3%) | 236 (6%) | 150 (3%) | <5 (3%) |
| antidiabetic drugs | 5 (2%) | 47 (2%) | 54 (1%) | <5 (0%) | 36 (6%) | 378 (6%) | 301 (4%) | 15 (7%) | 61 (15%) | 633 (16%) | 556 (13%) | 23 (18%) |
| ATII-blockers | 13 (4%) | 143 (4%) | 179 (4%) | 6 (6%) | 65 (11%) | 718 (12%) | 652 (9%) | 21 (9%) | 85 (21%) | 827 (20%) | 757 (17%) | 19 (15%) |
| betablockers | 129 (39%) | 1,044 (31%) | 811 (19%) | 16 (16%) | 195 (33%) | 2,044 (33%) | 1449 (20%) | 47 (21%) | 205 (52%) | 1,686 (41%) | 1,401 (32%) | 48 (38%) |
| calcium channel blockers | 47 (14%) | 411 (12%) | 517 (12%) | 14 (14%) | 165 (28%) | 1,752 (28%) | 1,663 (23%) | 59 (27%) | 163 (41%) | 1,640 (40%) | 1,692 (38%) | 38 (30%) |
| diuretics | 34 (10%) | 452 (14%) | 397 (9%) | 12 (12%) | 146 (25%) | 2,087 (34%) | 2,143 (29%) | 60 (27%) | 213 (54%) | 2,320 (57%) | 2,503 (57%) | 62 (48%) |
| glucocorticoids | 19 (6%) | 220 (7%) | 242 (6%) | 7 (7%) | 65 (11%) | 649 (10%) | 614 (8%) | 15 (7%) | 43 (11%) | 473 (12%) | 422 (10%) | 10 (8%) |
| insulin | <5 (1%) | 7 (0%) | 12 (0%) | <5 (0%) | 5 (1%) | 61 (1%) | 54 (1%) | <5 (2%) | 12 (3%) | 147 (4%) | 105 (2%) | 6 (5%) |
| NSAIDs | 37 (11%) | 376 (11%) | 678 (16%) | 11 (11%) | 67 (12%) | 816 (13%) | 991 (14%) | 30 (14%) | 39 (10%) | 405 (10%) | 438 (10%) | 19 (15%) |
| Statins | 49 (15%) | 524 (16%) | 630 (14%) | 18 (18%) | 173 (30%) | 1,826 (29%) | 1,466 (20%) | 58 (26%) | 172 (43%) | 1,733 (43%) | 1,289 (29%) | 37 (29%) |
| nitrates | 6 (2%) | 52 (2%) | 46 (1%) | <5 (4%) | 10 (2%) | 196 (3%) | 157 (2%) | 9 (4%) | 15 (4%) | 233 (6%) | 179 (4%) | 9 (7%) |
| PPI's | 62 (19%) | 533 (16%) | 723 (17%) | 17 (17%) | 157 (27%) | 1,564 (25%) | 1,588 (22%) | 41 (18%) | 141 (35%) | 1,237 (30%) | 1,231 (28%) | 26 (20%) |
| Abbreviations: NOAC: non-vitamin K antagonist oral anticoagulant; VKA: vitamin K antagonist; SD: standard deviation; AMI: acute myocardial infarction; ACE: Angiotensin Converting Enzyme; ATII: Angiotensin II: PPIs: proton pump inhibitors | | | | | | | | | | | | |
